# Supplementary material for: A comparative flood damage and risk impact assessment of land usechanges
Source: Copernicus journal article supplement (doi:10.5194/nhess-2021-51), 2021-02-22
Supplement: Supplementary file [file nhess-2021-51-RC1-supplement.pdf]

Review:

Title: A comparative flood damage and risk impact assessment of land use changes

Author(s): Karen Gabriels et al.

MS No.: nhess-2021-51

MS type: Research article

| location         | Text                                                                                                                                                                                                          | Issue to correct / refine                                                                                                                                                                                                                                                  |
|------------------|---------------------------------------------------------------------------------------------------------------------------------------------------------------------------------------------------------------|----------------------------------------------------------------------------------------------------------------------------------------------------------------------------------------------------------------------------------------------------------------------------|
| Abstract         | These measures include the establishment of land use types with a high (e.g. forest patches) or low (e.g. sealed surfaces) water retention and infiltration capacity at strategic locations in the catchment. | Use of sealed surfaces is a bit unusual and might imply the 'opposite of a nature-based solution'? It needs more explanation of how this has influenced the hydrology. Are you modelling urbanisation?                                                                     |
| Abstract         | Rainfall runoff model                                                                                                                                                                                         | Can you name the model here please and describe it in more detail                                                                                                                                                                                                          |
|                  | Sealing scenario                                                                                                                                                                                              | Needs more explanation – are you suggesting artificial surfaces?                                                                                                                                                                                                           |
| Line 34          | <i>Finally, the flood risk is determined by combining the flood damages caused by flood events with different return periods in a weighted summation.</i>                                                     | I think this definition should be more scientific, e.g.: Risk can be quantified in terms of an average annual damage, by weighting the computed impacts for design events with their respective annual exceedance probabilities.                                           |
| Para lines 40-50 |                                                                                                                                                                                                               | Reads well                                                                                                                                                                                                                                                                 |
| Line 51          | ...LATIS....                                                                                                                                                                                                  | Would it be better to introduce LATIS alongside your model and state the differences from the outset – especially the differences in assumptions on e.g. indirect damages. LATIS gets used and results presented but we don't really understand the background to it here. |
| Line 82          | <i>Using a flood damage model, flood damages were assessed from four flood events occurring in the Maarkebeek basin between 2000 and 2016</i>                                                                 | This flood damage model needs to be defined and more details provided. What were the antecedent conditions for each event? Soil moisture will strongly influence the assumptions on runoff generation                                                                      |
| Line 83          | <i>The overall flood risk was determined by combining the flood damages of the four events with their respective probability of occurrence.</i>                                                               | Please specify the assumption made at low return periods for the onset of flooding – do you assume onset at the median flood or somewhere between that and the minimum flood hazard used? What probability events were used? Please specify here.                          |
| Line 86          | <i>spatially explicit rainfall-runoff (RR) model, calculating the runoff volume accumulated in each pixel after a rainfall event</i>                                                                          | Please specify the model used!!!                                                                                                                                                                                                                                           |
| Line 95          | Return periods                                                                                                                                                                                                | Define in relation to annual exceedance probability and also specify which ones!                                                                                                                                                                                           |
| Line 97          | <i>Consequently, an empirical relationship between observed flood volumes and modeled runoff volume accumulation is established to</i>                                                                        | I think I understand this, but perhaps some curves of volume versus runoff should be shown to illustrate? Did you build a look-up table to relate the                                                                                                                      |

|          |                                                                                                                                                                      |                                                                                                                                                                                                                                                                        |
|----------|----------------------------------------------------------------------------------------------------------------------------------------------------------------------|------------------------------------------------------------------------------------------------------------------------------------------------------------------------------------------------------------------------------------------------------------------------|
|          | <i>determine the flood volumes after land use changes.</i>                                                                                                           | volume on the floodplain to runoff (volume? Peak flow?) for the available flood hazards? You could refer to figure 5 later.                                                                                                                                            |
| Line 99  | <i>Based on these modeled flood volumes, a DEM is progressively filled and corresponding water depths are thus determined.</i>                                       | One issue here is what happens if water in reality not going to reach a certain pixel until depths overcome an embankment? Do all depressions fill up simultaneously? I think this is very approximate                                                                 |
| Line 110 | Deriving depths and volumes                                                                                                                                          | This technique seems too approximate – some measure of uncertainty in the level might be useful – or a sensitivity analysis                                                                                                                                            |
| Figure 1 | diagram                                                                                                                                                              | I think the diagram could be explained better. I guess the delta is the estimated change in impacts. Perhaps an example of the statistical relationship would help such as a curve of depth versus runoff accumulation?                                                |
| 117      | CN-based                                                                                                                                                             | CN? Needs more explanation please                                                                                                                                                                                                                                      |
| 118      | <i>This CN-based RR-model propagates the runoff through the watershed, thereby continuously assessing downstream re-infiltration using the Manning's equation.</i>   | The Manning's equation is for open-channel flow – please explain tis better – how does it help assess the re-infiltration are you talking about a difference?                                                                                                          |
| 126      | equation                                                                                                                                                             | Ok I have also used a similar relationship so good to see this here.                                                                                                                                                                                                   |
| 140      | Figure 2                                                                                                                                                             | Interesting that the damage factor is so high for shallow flooding of roads – why is this? Is it relating to disruption losses?                                                                                                                                        |
| 149      | Household damages                                                                                                                                                    | What was the average max damage per unit area used for residential?<br>Please provide as you provide this for other receptors and later in the paper                                                                                                                   |
| 164      | Weighted summation                                                                                                                                                   | Not sure about the 'double counting' here – you are weighting the damages with the return period – or annual exceedance probability – it is not removing double counting?                                                                                              |
| 170      | Equation 4                                                                                                                                                           | The important factor here is your lowest return period modelled – as it sets the limit of what we know about the onset of flooding. What is your smallest RP modelled hazard? Was it 10 years?                                                                         |
| 193      | Interpolation                                                                                                                                                        | This is a better explanation /summary than earlier                                                                                                                                                                                                                     |
| 199      | Residential damages                                                                                                                                                  | Worth using earlier to give a feel for the range                                                                                                                                                                                                                       |
| 219      | This procedure ranks pixels based on (i) where in the upstream area of the flooded zones afforestation maximally reduces the runoff accumulation in these zones, and | I do not understand how you have moderated the upstream accumulations in the modelled land use change – how is this represented in the model. This is really important to the credibility.<br>Are you assuming the top 750 pixels don't contribute anymore or is there |

|           |                       |                                                                                                                                                                                                                                                                                                                                                                                                                                                      |
|-----------|-----------------------|------------------------------------------------------------------------------------------------------------------------------------------------------------------------------------------------------------------------------------------------------------------------------------------------------------------------------------------------------------------------------------------------------------------------------------------------------|
|           |                       | <p>some sort of fractional reduction? On what evidence is it based? The modelled change leads to a BIG reduction in damages, so needs fully explaining.</p> <p>Also the afforestation must surely have a different impact on runoff depending on the soil moisture – which depends on the antecedent rainfall . I think you need to state your assumptions or model more conditions, and also which hydrological processes you are representing.</p> |
| 220       | Prioritising pixels   | I think the uncertainties will be high in this approach – It would be good to understand the sensitivity of the outcomes: for example - the errors in damages that could be incurred due to +/- 0.1m error in the water surface level                                                                                                                                                                                                                |
| 236       | determine             | Replace use of this word with estimate                                                                                                                                                                                                                                                                                                                                                                                                               |
| 243       | error                 | There are 2 formatting errors                                                                                                                                                                                                                                                                                                                                                                                                                        |
| 255       | inflicted             | Replace with 'incurred'                                                                                                                                                                                                                                                                                                                                                                                                                              |
| Figure 5  | discussion            | Discuss the impact of the lower return period damages mainly being underestimated by the regression model compared to the data. These will all be weighted more strongly. Perhaps a two stage relationship is needed? Again, sensitivity to this would help understand the decisions that could be made.                                                                                                                                             |
| Figure 6  | 5m*5m impact cells    | If you are using 5m then may be a flow accumulation grid using 5m DTM would have been more appropriate / compatible (instead of 50m)?                                                                                                                                                                                                                                                                                                                |
| Line 277  | Comparative damages   | <p>These reductions in damages are very large and of concern – would woodland really have such a big impact?</p> <p>– what antecedent conditions do you assume in the 'model' for different storms?</p>                                                                                                                                                                                                                                              |
| 285       | Sealing scenario      | The change is not nearly so great                                                                                                                                                                                                                                                                                                                                                                                                                    |
| 353       | comparison            | It is good to compare with other estimates                                                                                                                                                                                                                                                                                                                                                                                                           |
| 357/8     | Comparison with LATIS | if indirect damages are being assessed in one model but not the other then it might be possible to just use a factor to correct and allow a better comparison.                                                                                                                                                                                                                                                                                       |
|           |                       |                                                                                                                                                                                                                                                                                                                                                                                                                                                      |
| 360       | uncertainties         | ...but you could help define the uncertainties better with more sensitivity analysis here                                                                                                                                                                                                                                                                                                                                                            |
| Figure 11 | LATIS reporting       | I'm not sure why the LATIS reporting and outputs are shown here as it's not                                                                                                                                                                                                                                                                                                                                                                          |

|                 |                   |                                                                                                                                                                                                                                                                                                                                                                                                                                                                                                              |
|-----------------|-------------------|--------------------------------------------------------------------------------------------------------------------------------------------------------------------------------------------------------------------------------------------------------------------------------------------------------------------------------------------------------------------------------------------------------------------------------------------------------------------------------------------------------------|
|                 |                   | been used in the main study? Is this just for comparison – in which case a side-by-side plot might be more useful with your method or an overlay.                                                                                                                                                                                                                                                                                                                                                            |
| Line 373 + 382  | Use of regression | See comments about two stage or exponential regression, plus this section should include information summarising antecedent soil moisture for the calibration events – are they different? How do they vary seasonally? You finally mention boundary conditions in the last section – I think this is very important and may account for some of the scatter etc.                                                                                                                                            |
| 385/conclusions | First sentence    | The framework does allow for this comparison but I think the uncertainties must be very high, and the predicted reductions in flood risk seem very high.                                                                                                                                                                                                                                                                                                                                                     |
| 394             | 57% reduction     | <p>I haven't seen values this high – you need explain what mechanisms in hydrology can help with this – are you including:</p> <ul style="list-style-type: none"> <li>• Increased infiltration</li> <li>• Increased soil storage</li> <li>• Increased transmissivity in soil profile</li> <li>• Increased wet-canopy evaporation</li> <li>• Increased friction</li> </ul> <p>I think you need to explore how the changes you've imposed in the model are justified in relation to hydrological processes</p> |
|                 |                   |                                                                                                                                                                                                                                                                                                                                                                                                                                                                                                              |
|                 |                   |                                                                                                                                                                                                                                                                                                                                                                                                                                                                                                              |
